# Supplementary material for: Photocatalytic one-pot alkylation of nitrobenzene with benzyl alcohol for the precise synthesis of N-benzylideneaniline over F-doped Bi2MoO6 nanosheets
Source: Royal Society of Chemistry journal article supplement (doi:10.1039/d3cy00528c), 2023-01-01
Supplement: d3cy00528c1.pdf [file d3cy00528c1.pdf]

Photocatalytic one-pot alkylation of nitrobenzene with benzyl alcohol for  
precise synthesis of N-benzylidenaniline over F-doped Bi<sub>2</sub>MoO<sub>6</sub>  
nanosheets

Guangcheng Zou,<sup>a</sup> Rui Cao,<sup>a</sup> Conghui Cui,<sup>a</sup> Yuqiang Luo,<sup>a</sup> Chen Huang,<sup>a</sup> Xinwei  
Cui,<sup>a</sup> zhiwen wang,<sup>a</sup> Yujie Song<sup>a\*</sup>

<sup>a</sup> Hainan Provincial Key Laboratory of Fine Chemicals, Hainan University, Haikou  
570228, P. R. China.

\*Corresponding authors.

E-mail addresses: songyujie@hainanu.edu.cn

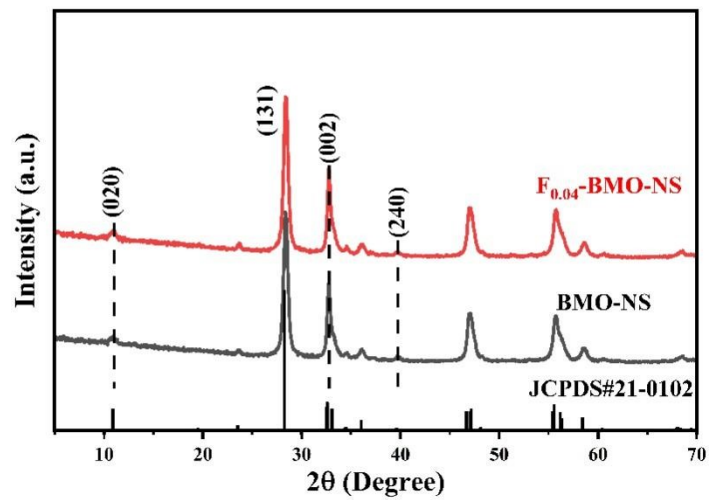

Fig. S1. XRD patterns of  $F_{0.04}$ -BMO-NS and BMO-NS

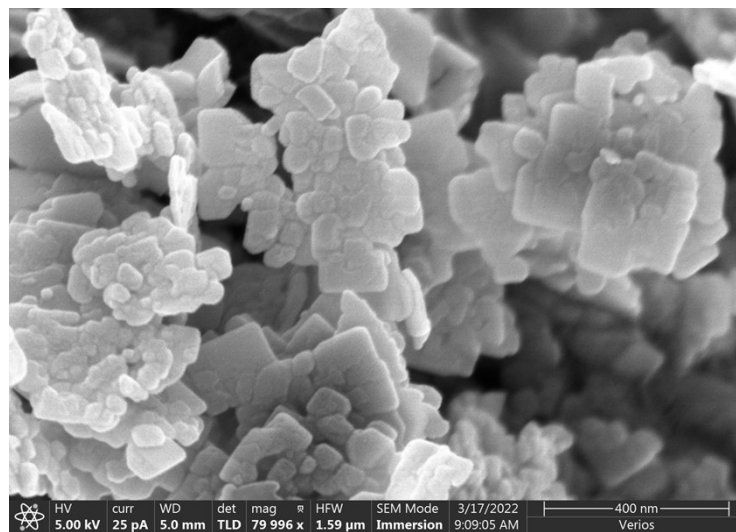

Fig. S2. The SEM image of the prepared  $F_{0.04}$ -BMO-B sample.

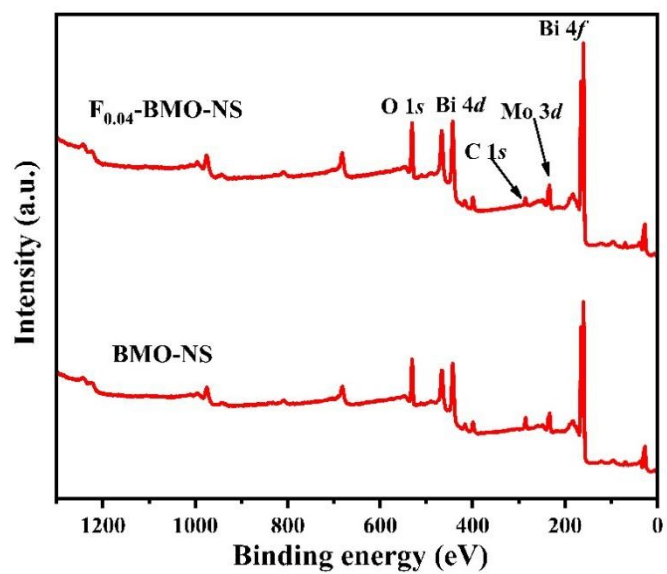

**Fig. S3.** XPS survey of the prepared  $F_{0.04}$ -BMO-NS and BMO-NS samples

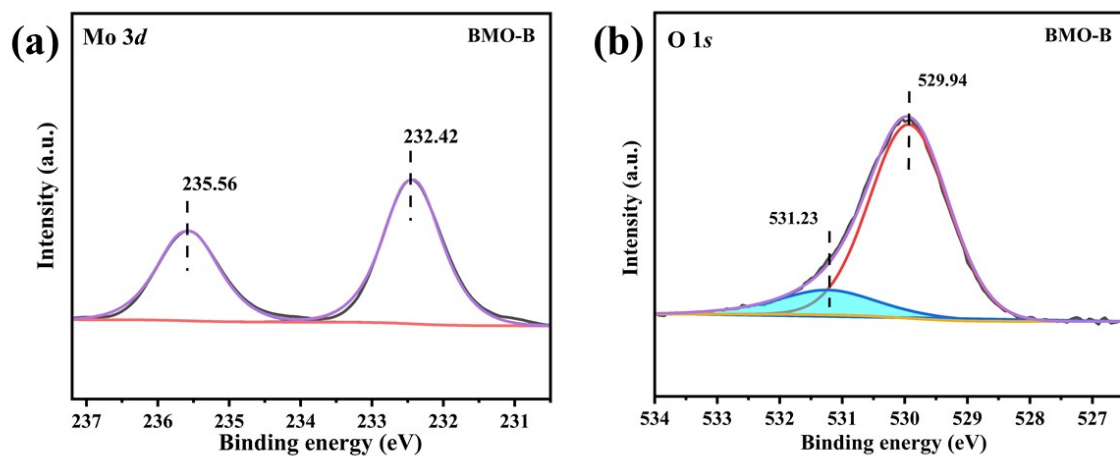

**Fig. S4.** XPS spectra of the BMO-bulk sample for (a) Mo 3d and (b) O 1s

| Samples                   | Peak  | Assignment       | Fraction (%) |
|---------------------------|-------|------------------|--------------|
| BMO-NS                    | Mo 3d | Mo <sup>5+</sup> | 5.9          |
|                           |       | Mo <sup>6+</sup> | 94.1         |
| F <sub>0.04</sub> -BMO-NS | Mo 3d | Mo <sup>5+</sup> | 11.3         |
|                           |       | Mo <sup>6+</sup> | 88.7         |
| BMO-NS                    | O 1s  | Bridging oxygen  | 20           |
|                           |       | Lattice oxygen   | 80           |
| F <sub>0.04</sub> -BMO-NS | O 1s  | Bridging oxygen  | 10           |
|                           |       | Lattice oxygen   | 90           |

**Table. S1.** XPS fitting results for the prepared BMO-NS and F<sub>0.04</sub>-BMO-NS.

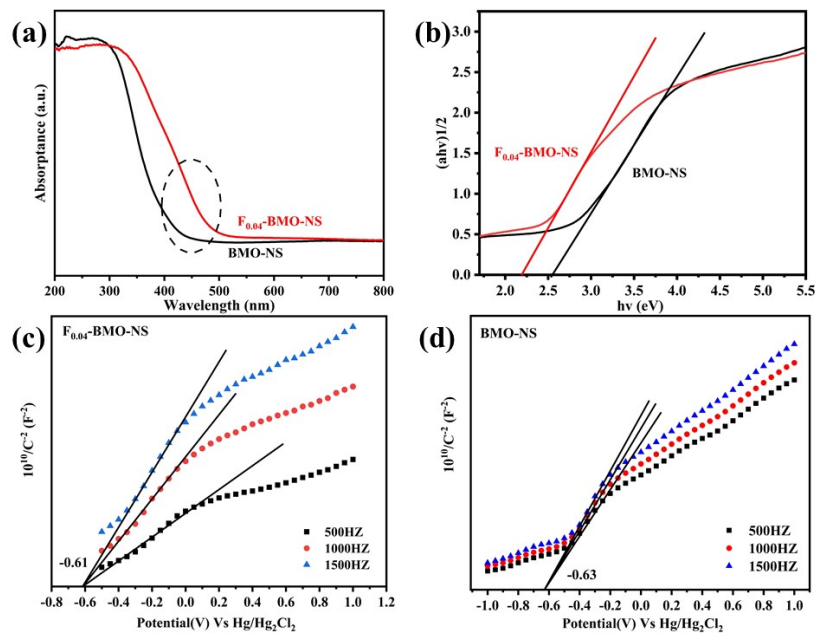

**Fig. S5.** (a-b) UV-vis DRS spectra and (FR)0.5 as a function of photonenergy (hv).  
 (c-d) Mott-Schottky plots of BMO-NS and F<sub>0.04</sub>-BMO-NS.

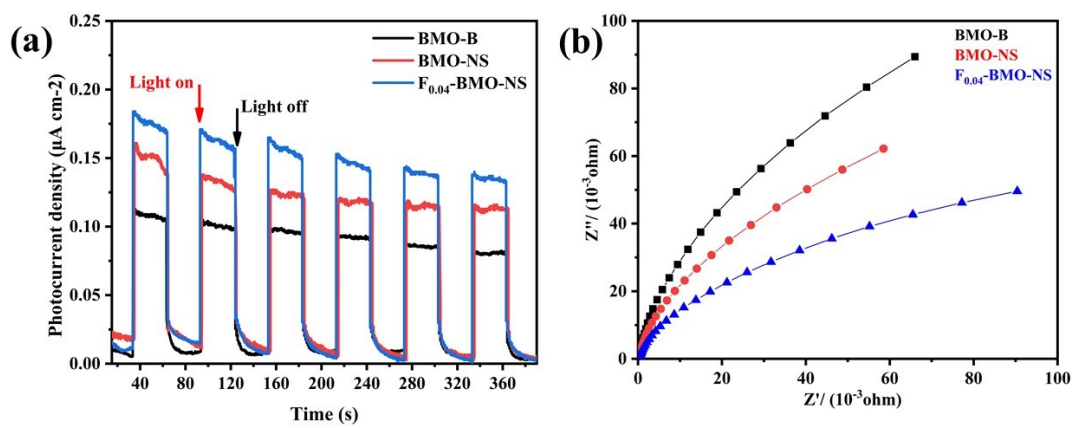

Fig. S6. (a) photocurrent responses of prepared samples and (b) Nyquist impedance plots.

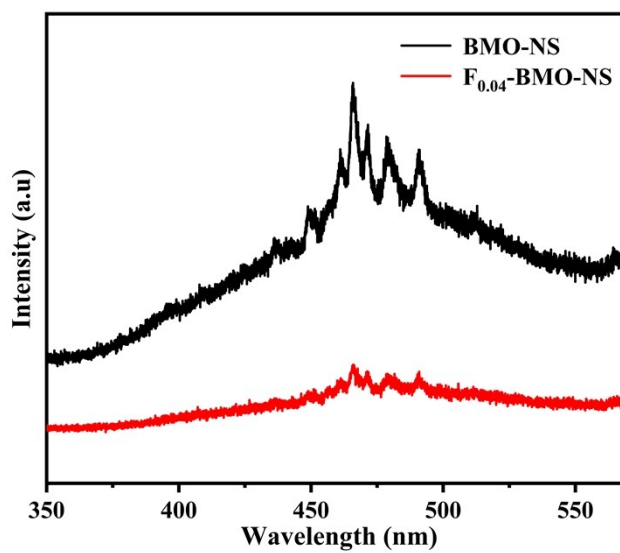

Fig. S7 Photoluminescence spectra of  $F_{0.04}$ -BMO-NS and BMO-NS

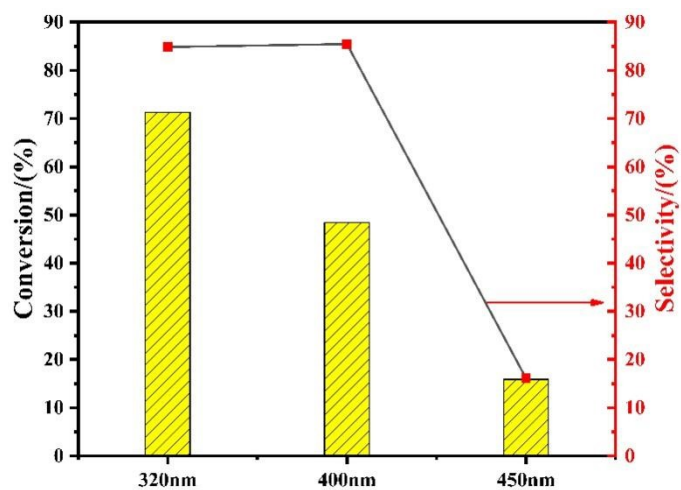

**Fig. S8.** Photocatalytic performances of the  $F_{0.04}$ -BMO-NS under irradiation of various light wavelength. Reaction conditions: nitrobenzene (0.2 mmol), catalyst (10 mg), benzyl alcohol (1.5 mL),  $N_2$  (1 atm), irradiation time (4 h).

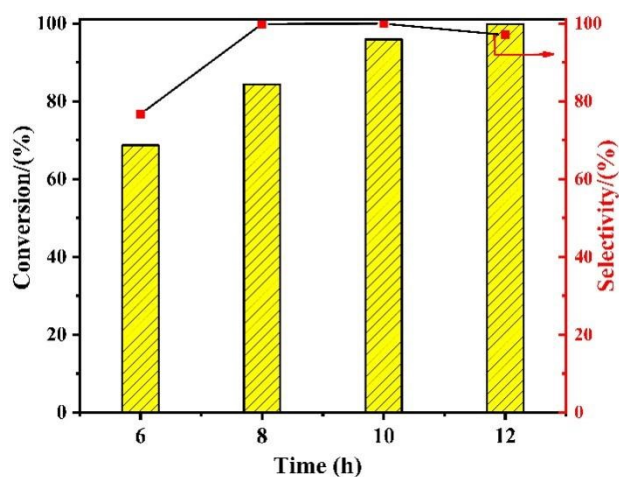

**Fig. S9.** Reaction time on  $F_{0.04}$ -BMO-NS for the selective photo-alkylation of benzyl alcohol with nitrobenzene to imine

<色谱图>  
uV

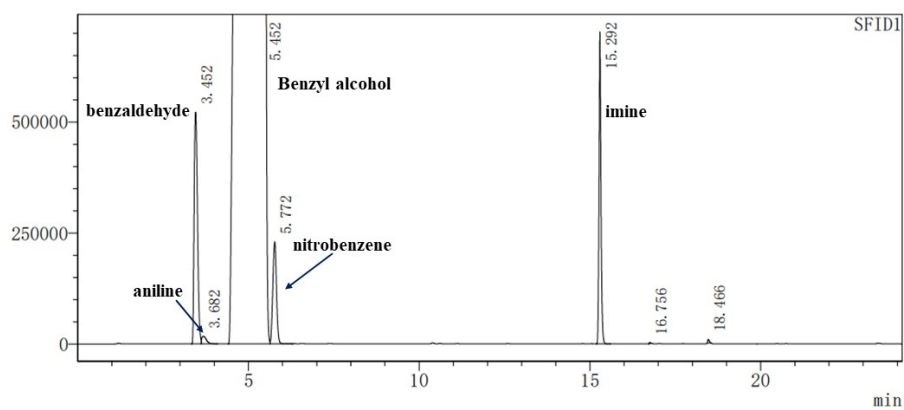

Fig.S10 Chromatogram for the products of 0.2 mmol nitrobenzene reacting with 1.5 ml benzyl alcohol for 6 h

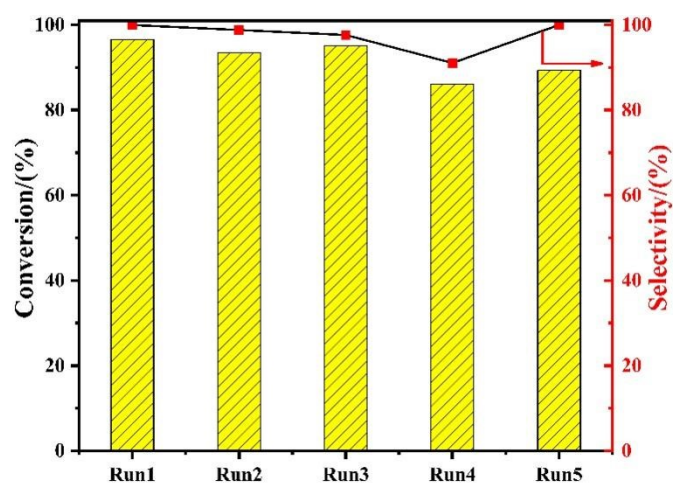

Fig. S11. Cycling test for photo-alkylation of benzyl alcohol with nitrobenzene to imine over  $F_{0.04}$ -BMO-NS.

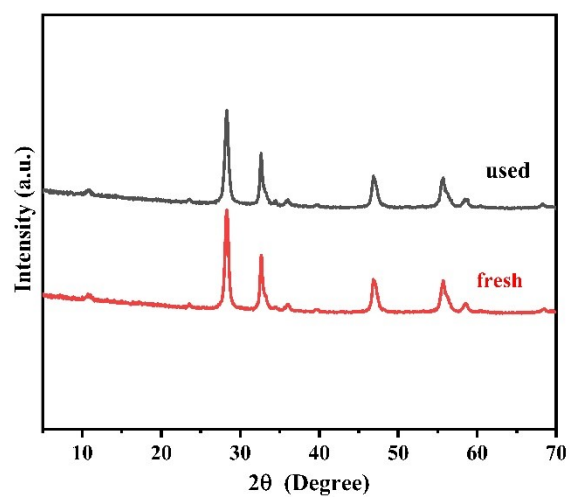

**Fig. S12.** XRD patterns of F<sub>0.04</sub>-BMO-NS before and after five photocatalytic reactions.
